# Supplementary material for: Comparative Proton and Photon Irradiation Combined with Pharmacological Inhibitors in 3D Pancreatic Cancer Cultures
Source: MDPI journal article supplement (doi:10.3390/cancers12113216), 2020-10-31
Supplement: s1 [file s1]

## **Supplementary Materials**

### **Comparative proton and photon irradiation combined with pharmacological inhibitors in 3D pancreatic cancer cultures**

Josephine Göрте, Elke Beyreuther, Erik H. J. Danen and Nils Cordes

## Supplementary Figures

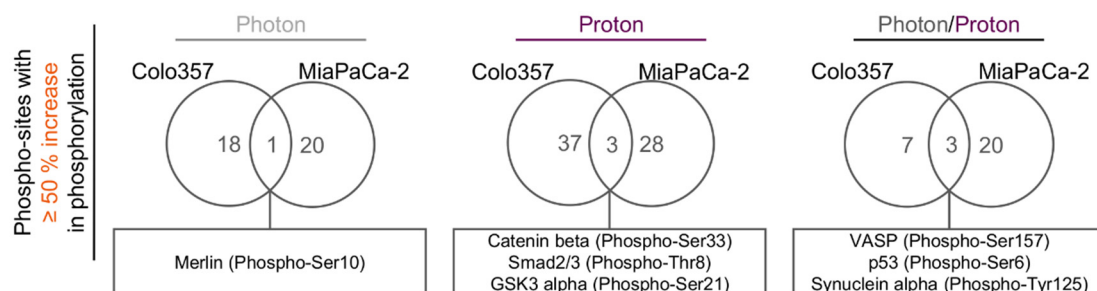

**Figure S1.** Changes in the phosphoproteome of 3D PDAC cell cultures by proton and photon irradiation. Venn diagram analysis comparing phospho-sites altered by  $\geq 50\%$  increase in phosphorylation of Colo357 and MiaPaCa-2 cell lines either specifically after photons and protons or by both kinds of irradiation.

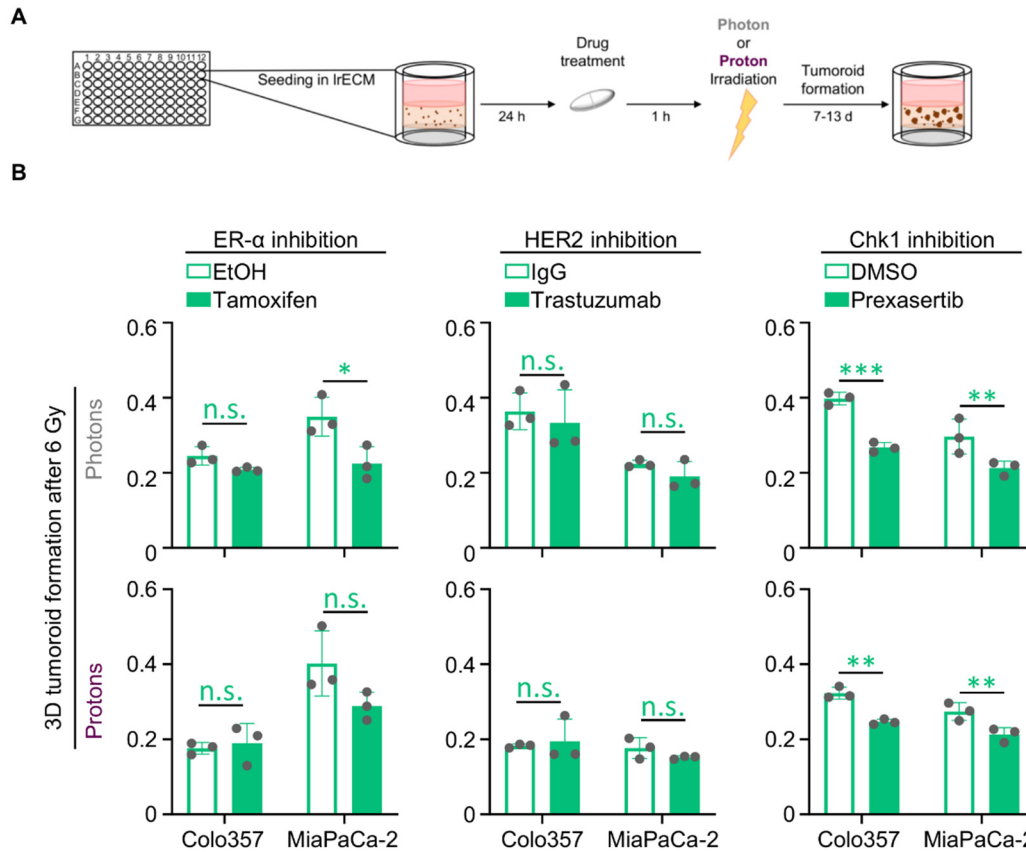

**Figure S2.** Photon and proton irradiated 3D PDAC cell cultures differentially respond to tamoxifen, trastuzumab and prexasertib. (A) Experimental set-up for examining 3D PDAC tumoroid growth; (B) 3D tumoroid formation capacity upon 1-h pretreatment with tamoxifen, trastuzumab or prexasertib in combination with 6-Gy photon or proton irradiation. All results show mean  $\pm$  SD ( $n = 3$ ; two-sided  $t$  test; \*,  $P < 0.05$ ; \*\*,  $P < 0.01$ ; \*\*\*,  $P < 0.001$ ).

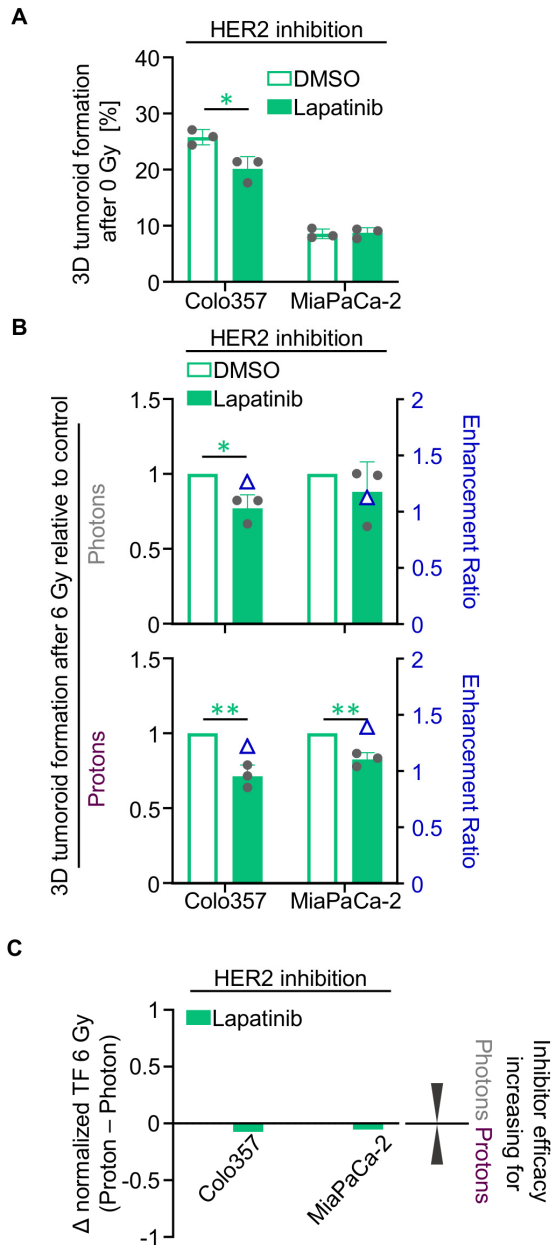

**Figure S3.** Photon and proton irradiated 3D PDAC cell cultures differentially respond to lapatinib. (A) 3D tumoroid formation capacity of unirradiated Colo357 and MiaPaCa-2 cells treated with lapatinib (experimental set-up shown in Fig. S2A); (B) Normalized 3D tumoroid formation capacity upon 1-h pretreatment with lapatinib in combination with 6-Gy photon or proton irradiation. Enhancement ratio (tumoroid formation capacity after 6 Gy control treatment/tumoroid formation capacity after 6 Gy inhibitor treatment) are indicated as blue triangles; (C) Differences in the radiosensitizing efficacy of inhibitors visualized by  $\Delta$  values of normalized tumor formation capacity (tumoroid formation capacity after 6 Gy of protons - tumoroid formation capacity after 6 Gy of photons). All results show mean  $\pm$  SD (n = 3; two-sided t test; \*, P < 0.05; \*\*, P < 0.01);  $\Delta$ : delta, TF: tumoroid formation.

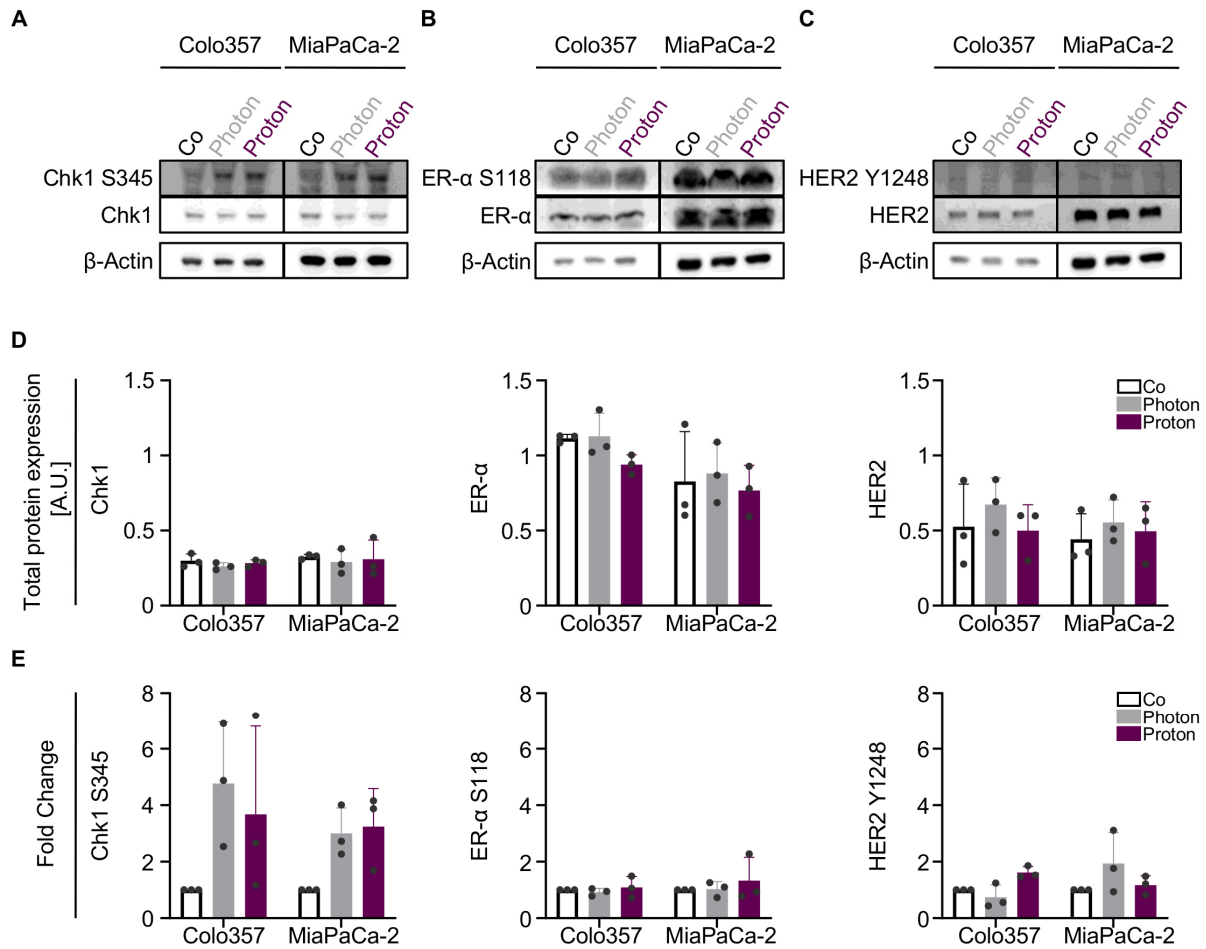

**Figure S4.** Photon and proton irradiation differentially affect the phosphorylation status of Chk1, ER- $\alpha$  and HER2 of 3D PDAC cell cultures. (**A**, **B**, **C**) Immunoblots on whole cell lysates from 0-Gy (Co) or 6-Gy photon or 6-Gy proton irradiated Colo357 and MiaPaCa-2 cells showing total and phosphorylated forms of Chk1, ER- $\alpha$  and HER2.  $\beta$ -Actin served as loading control. (**D**) Densitometry of normalized total forms of Chk1, ER- $\alpha$  and HER2 from A, B and C. (**E**) Fold change of phosphorylated forms of Chk1, ER- $\alpha$  and HER2 from A, B and C. All results show mean  $\pm$  SD ( $n = 3$ ); A.U.: arbitrary unit, Co: control.

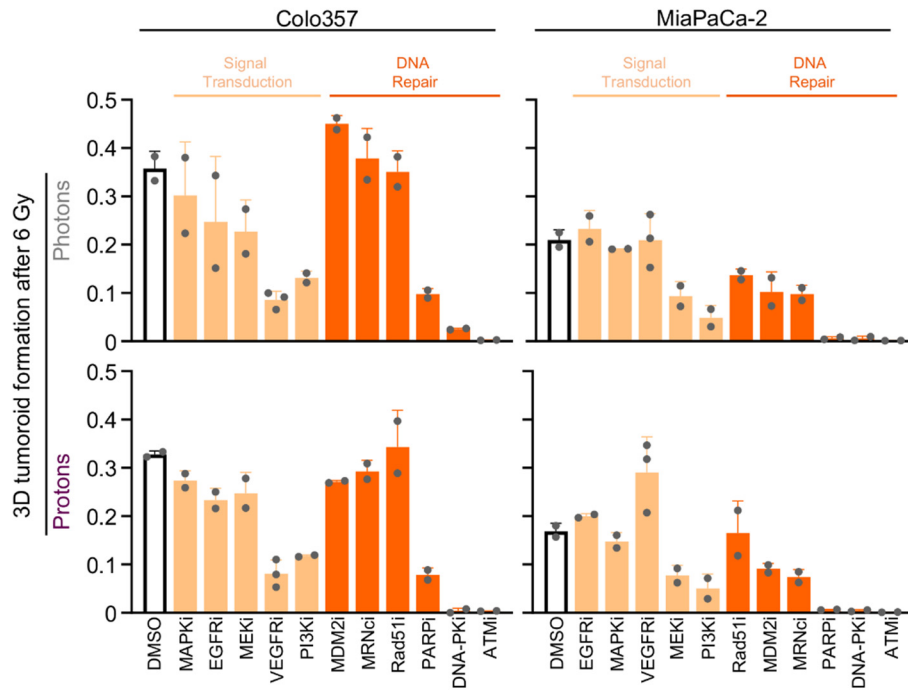

**Figure S5.** Targeting of signal transduction and DNA repair enzymes sensitizes PDAC cell cultures to photon and proton irradiation. 3D tumoroid formation capacity upon 1-h inhibitor pretreatment combined with 6-Gy photon or proton irradiation. All results show mean  $\pm$  SD ( $n \geq 2$ ).

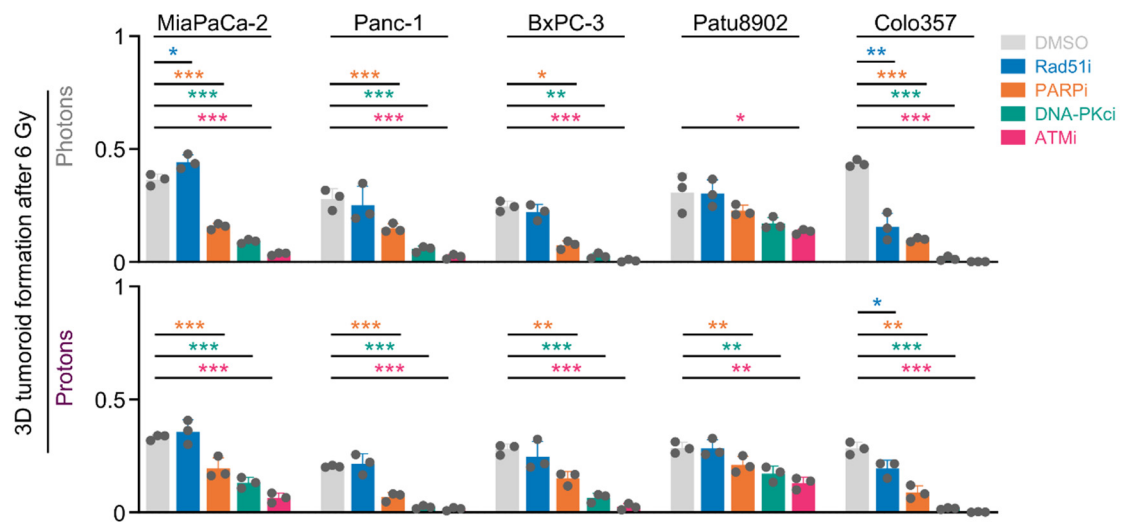

**Figure S6.** Targeting NHEJ associated enzymes seems generally potent to sensitize 3D PDAC cell cultures to photon and proton irradiation. 3D tumoroid formation capacity upon 1-h inhibitor pretreatment combined with 6-Gy photon or proton irradiation. All results show mean  $\pm$  SD ( $n = 3$ ; two-sided t test; \*,  $P < 0.05$ ; \*\*,  $P < 0.01$ ; \*\*\*,  $P < 0.001$ ).

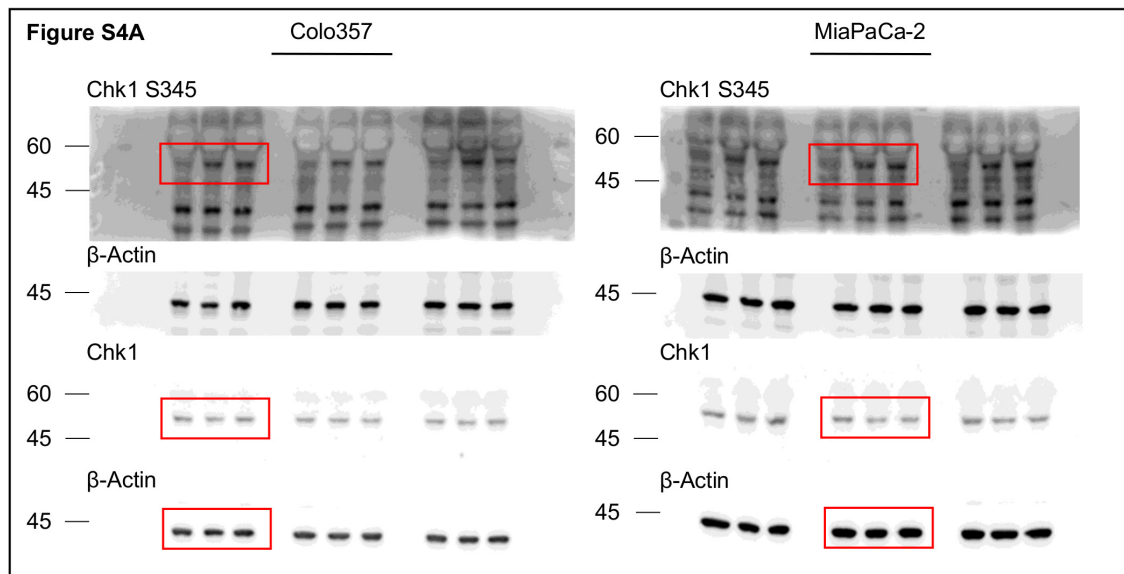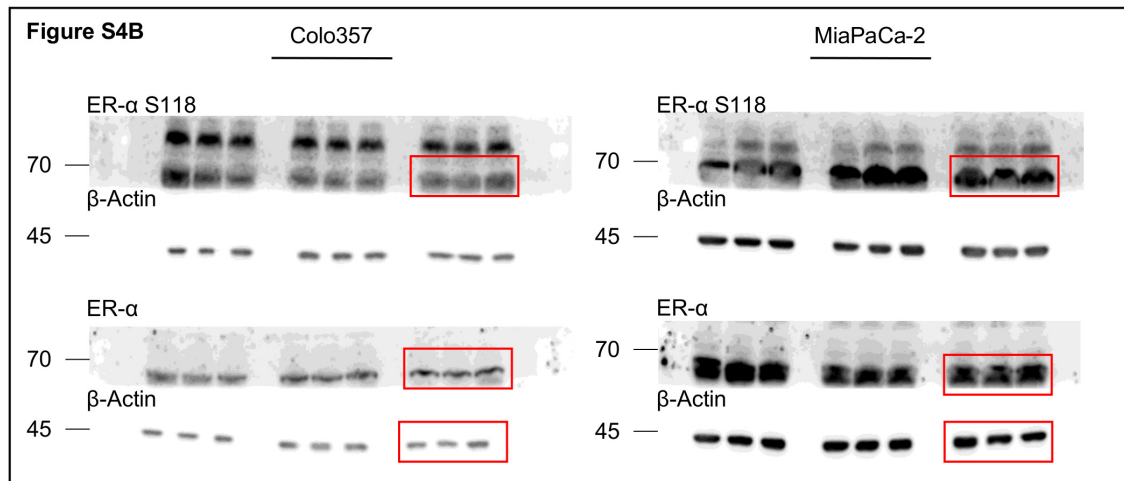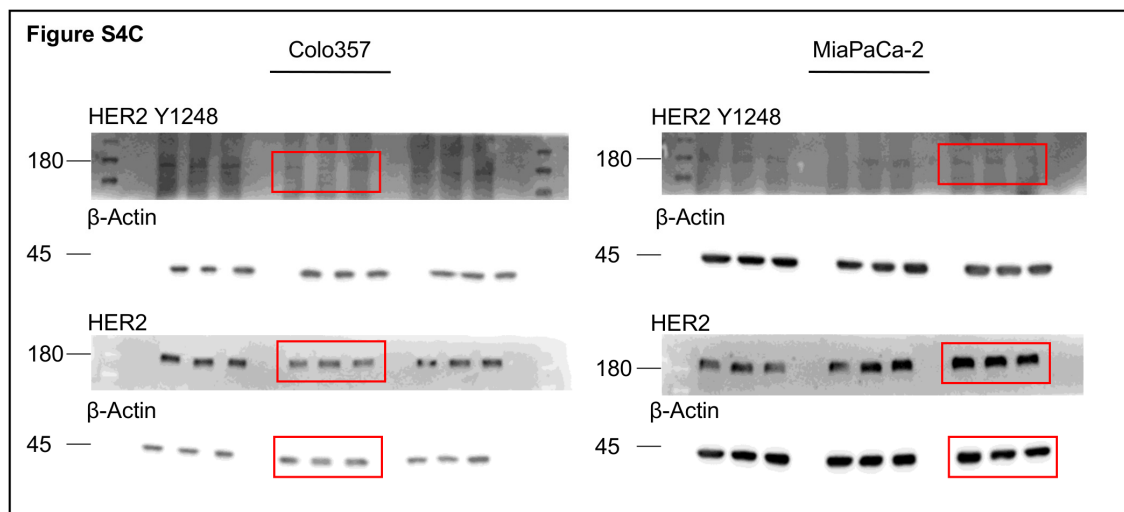

**Figure S7.** Compilation of uncropped immunoblots for Figure S4A-C. The corresponding main figures where the cropped versions are shown are specified on top of the blots. The red rectangles display the areas of the plots that were used in Figure S4A-C. The molecular weight standard [kDa] per blot is located on the left. The detected protein is indicated on top of the blots.



## Supplementary Tables

**Table S1.** RBE values comparing proton to photon irradiation effectiveness in PDAC cell lines.

| Cell Line | RBE |
|-----------|-----|
| MiaPaCa-2 | 1.2 |
| Panc-1    | 1.7 |
| BxPC-3    | 0.6 |
| Patu8902  | 1.4 |
| Colo357   | 2.1 |

**Table S2.** SF2 values of PDAC cell lines after photon and proton irradiation.

| Cell Line | SF2 Gy<br>Photon | SF2 Gy<br>Proton |
|-----------|------------------|------------------|
| MiaPaCa-2 | 0.69             | 0.61             |
| Panc-1    | 0.58             | 0.34             |
| BxPC-3    | 0.56             | 0.61             |
| Patu8902  | 0.70             | 0.51             |
| Colo357   | 0.73             | 0.51             |

**Table S3.** Changes in the phosphoproteome of 3D Colo357 cell cultures upon proton or photon irradiation. Alterations of phosphorylation sites in Colo357 cells upon 6 Gy-photon or -proton irradiation after normalization to 0 Gy; data in the order of fold change (high to low) of photon induced changes.

| Phospho-site                           | Photon     | Proton     |
|----------------------------------------|------------|------------|
| Ret (Phospho-Tyr905)                   | 2.70063991 | 2.17900741 |
| c-Jun (Phospho-Thr93)                  | 2.45253332 | 2.98009779 |
| Raf1 (Phospho-Ser259)                  | 2.39273888 | 1.52443335 |
| Progesterone Receptor (Phospho-Ser190) | 2.1791565  | 1.09130718 |
| Myc (Phospho-Thr358)                   | 2.1556917  | 2.06737326 |
| Smad1 (Phospho-Ser187)                 | 1.98893291 | 1.15605866 |
| CaMK2A (Phospho-Thr286)                | 1.98326727 | 1.00479118 |
| p38 MAPK (Phospho-Tyr182)              | 1.9786095  | 1.42266531 |
| JAK2 (Phospho-Tyr221)                  | 1.84789351 | 1.14415143 |
| B-RAF (Phospho-Thr598)                 | 1.76563059 | 1.20751251 |
| JunB (Phospho-Ser79)                   | 1.71460595 | 0.94995046 |
| Chk1 (Phospho-Ser317)                  | 1.70814535 | 1.1799637  |
| Merlin (Phospho-Ser10)                 | 1.70567351 | 0.74910004 |
| VEGFR2 (Phospho-Tyr1214)               | 1.70482966 | 1.19974658 |
| SHP-2 (Phospho-Tyr542)                 | 1.70311842 | 1.91802862 |
| ATF2 (Phospho-Thr69/51)                | 1.69764565 | 1.43928945 |
| Synuclein alpha (Phospho-Tyr125)       | 1.63698527 | 1.53090582 |
| p53 (Phospho-Ser6)                     | 1.62937698 | 2.41819121 |
| VASP (Phospho-Ser157)                  | 1.5991608  | 1.54943129 |
| PKC delta (Phospho-Ser645)             | 1.59735986 | 1.89258878 |
| Rel (Phospho-Ser503)                   | 1.58767633 | 0.75961686 |
| BLNK (Phospho-Tyr96)                   | 1.58540286 | 1.3699548  |

|                                          |            |            |
|------------------------------------------|------------|------------|
| BCR (Phospho-Tyr177)                     | 1.56788116 | 1.34324107 |
| Myc (Phospho-Ser62)                      | 1.5524829  | 1.51849616 |
| KIT (Phospho-Tyr936)                     | 1.55060283 | 1.01841641 |
| P90RSK (Phospho-Thr359/Ser363)           | 1.54011285 | 1.48606198 |
| HSP27 (Phospho-Ser82)                    | 1.52795653 | 1.14581854 |
| ICAM-1 (Phospho-Tyr512)                  | 1.5265309  | 1.39545342 |
| Estrogen Receptor-alpha (Phospho-Ser167) | 1.50857962 | 1.20830175 |
| MEK1 (Phospho-Thr291)                    | 1.48228625 | 1.90442439 |
| GABA-RB (Phospho-Ser434)                 | 1.4054177  | 1.50425061 |
| FKHR (Phospho-Ser256)                    | 1.34986614 | 1.50049394 |
| HDAC8 (Phospho-Ser39)                    | 1.31556498 | 2.05665571 |
| AMPK1/AMPK2 (Phospho-Ser485/491)         | 1.31431106 | 1.59200518 |
| Shc (Phospho-Tyr349)                     | 1.30686317 | 1.81838205 |
| LKB1 (Phospho-Thr189)                    | 1.29338126 | 1.66974721 |
| MARCKS (Phospho-Ser163)                  | 1.24701261 | 1.60057644 |
| LIMK1 (Phospho-Thr508)                   | 1.23044136 | 0.64018335 |
| IR (Phospho-Tyr1361)                     | 1.20204333 | 1.60053413 |
| STAT6 (Phospho-Thr645)                   | 1.19342586 | 1.53553826 |
| NFkB-p65 (Phospho-Ser276)                | 1.19253845 | 1.82927185 |
| Rac1/cdc42 (Phospho-Ser71)               | 1.18113105 | 1.7964397  |
| FAK (Phospho-Tyr861)                     | 1.17525367 | 1.5247009  |
| Ras-GRF1 (Phospho-Ser916)                | 1.15163461 | 0.62467844 |
| SYK (Phospho-Tyr525)                     | 1.1490482  | 0.65631925 |
| Integrin beta-3 (Phospho-Tyr785)         | 1.1398226  | 1.90470634 |
| IL-4R/CD124 (Phospho-Tyr497)             | 1.13786696 | 1.55179048 |
| SAPK/JNK (Phospho-Tyr185)                | 1.13158284 | 1.52777734 |
| c-Jun (Phospho-Ser243)                   | 1.13090858 | 1.76043884 |
| Raf1 (Phospho-Ser43)                     | 1.11995903 | 0.59497579 |
| ATF4 (Phospho-Ser245)                    | 1.0980444  | 2.09308654 |
| AKT1 (Phospho-Tyr474)                    | 1.09640995 | 1.51336031 |
| Histone H2A.X (Phospho-Ser139)           | 1.09261964 | 0.5888499  |
| EGFR (Phospho-Tyr1069)                   | 1.09218295 | 1.78614458 |
| JunD (Phospho-Ser255)                    | 1.07129202 | 1.65802969 |
| Src (Phospho-Tyr529)                     | 1.06801471 | 1.88238771 |
| IRS-1 (Phospho-Ser636)                   | 1.06455254 | 1.63591427 |
| HNF4 alpha (Phospho-Ser313)              | 1.05989507 | 1.52074853 |
| Zap-70 (Phospho-Tyr319)                  | 1.05497803 | 1.50537894 |
| Catenin beta (Phospho-Ser33)             | 1.05326336 | 1.62758358 |
| GSK3 alpha (Phospho-Ser21)               | 1.04457457 | 2.05284178 |
| HER2 (Phospho-Tyr1248)                   | 1.03852483 | 1.67173687 |
| MEK1 (Phospho-Ser221)                    | 1.03082342 | 0.62305104 |
| Stathmin 1 (Phospho-Ser37)               | 1.0219395  | 1.53928559 |
| GluR1 (Phospho-Ser863)                   | 1.02161512 | 1.53252141 |
| PKC zeta (Phospho-Thr410)                | 1.01841503 | 0.6454938  |
| Src (Phospho-Tyr418)                     | 0.99741722 | 0.6674143  |
| Tau (Phospho-Ser235)                     | 0.99690644 | 0.63050923 |
| HSP90B (Phospho-Ser254)                  | 0.9917134  | 0.60779095 |
| p27Kip1 (Phospho-Thr187)                 | 0.98348729 | 1.69426297 |
| PAK3 (Phospho-Ser154)                    | 0.9684073  | 1.58266132 |
| p53 (Phospho-Ser15)                      | 0.96313904 | 0.68580232 |
| Kv1.3/KCNA3 (Phospho-Tyr135)             | 0.95782663 | 1.65050849 |
| p53 (Phospho-Thr18)                      | 0.95361538 | 1.52339744 |

|                                     |            |            |
|-------------------------------------|------------|------------|
| P70S6K (Phospho-Ser424)             | 0.93712208 | 1.58327759 |
| EGFR (Phospho-Thr678)               | 0.9188876  | 0.64955752 |
| SP1 (Phospho-Thr739)                | 0.88683661 | 0.62651589 |
| Smad2/3 (Phospho-Thr8)              | 0.88243607 | 1.60691098 |
| Integrin beta-4 (Phospho-Tyr1510)   | 0.86915265 | 0.68943398 |
| HSP90B (Phospho-Ser226)             | 0.86887939 | 1.99080699 |
| Catenin beta (Phospho-Thr41/Ser45)  | 0.8525006  | 0.682244   |
| Cyclin D1 (Phospho-Thr286)          | 0.82098739 | 1.58053313 |
| EEF2 (Phospho-Thr56)                | 0.81276026 | 0.60643045 |
| NFkB-p65 (Phospho-Thr435)           | 0.78788937 | 1.70770431 |
| ETK (Phospho-Tyr40)                 | 0.77033365 | 0.62065896 |
| Abl1 (Phospho-Tyr204)               | 0.76143802 | 0.43925468 |
| STAT4 (Phospho-Tyr693)              | 0.76021291 | 0.68216386 |
| GluR1 (Phospho-Ser849)              | 0.74596352 | 0.39675663 |
| Synaptotagmin (Phospho-Thr202)      | 0.74484621 | 0.67370037 |
| BRCA1 (Phospho-Ser1457)             | 0.73801274 | 0.62182356 |
| BTk (Phospho-Tyr223)                | 0.7328498  | 0.58613631 |
| c-Jun (Phospho-Ser63)               | 0.69651036 | 1.28411481 |
| CDK2 (Phospho-Thr160)               | 0.69059098 | 0.91193142 |
| MSK1 (Phospho-Thr581)               | 0.67466541 | 0.97537095 |
| IKK-alpha/beta (Phospho-Ser180/181) | 0.66848208 | 0.57919427 |
| DAPP1 (Phospho-Tyr139)              | 0.66347416 | 0.5308503  |
| Tau (Phospho-Thr212)                | 0.60429967 | 2.26777101 |
| JunB (Phospho-Ser259)               | 0.58304899 | 0.99686023 |
| EGFR (Phospho-Tyr1110)              | 0.55972525 | 1.2079582  |
| IRS-1 (Phospho-Ser312)              | 0.55379573 | 0.89430778 |
| CDC25C (Phospho-Ser216)             | 0.49143091 | 0.3439015  |
| Cortactin (Phospho-Tyr421)          | 0.4224753  | 0.46944096 |
| Elk1 (Phospho-Thr417)               | 0.41500116 | 1.11929826 |
| VEGFR2 (Phospho-Tyr1175)            | 0.37927802 | 0.42769493 |
| HDAC1 (Phospho-Ser421)              | 0.37347245 | 0.37562516 |

**Table S4.** Changes in the phosphoproteome of 3D MiaPaCa-2 cell cultures upon proton or photon irradiation. Alterations of phosphorylation sites in MiaPaCa-2 cells upon 6 Gy-photon or -proton irradiation after normalization to 0 Gy; data in the order of fold change (high to low) of photon induced changes.

| Phospho-site                 | Photon     | Proton     |
|------------------------------|------------|------------|
| GluR1 (Phospho-Ser849)       | 3.12639767 | 1.62091688 |
| Chk1 (Phospho-Ser317)        | 2.85340647 | 3.96590262 |
| IRS-1 (Phospho-Ser312)       | 2.45175548 | 1.60138521 |
| Chk1 (Phospho-Ser286)        | 2.43553012 | 1.28299702 |
| c-Jun (Phospho-Ser243)       | 2.31396824 | 1.35734707 |
| Cortactin (Phospho-Tyr421)   | 2.29826829 | 1.12561208 |
| 4E-BP1 (Phospho-Thr45)       | 2.26997323 | 2.30210331 |
| p44/42 MAPK (Phospho-Thr202) | 2.17424821 | 1.59633561 |
| CREB (Phospho-Ser133)        | 2.09651235 | 1.38341264 |
| GAP43 (Phospho-Ser41)        | 2.04650163 | 1.54533559 |
| Merlin (Phospho-Ser10)       | 1.99347151 | 1.24975263 |
| EGFR (Phospho-Tyr1110)       | 1.93990268 | 1.99450638 |
| HDAC8 (Phospho-Ser39)        | 1.93672295 | 1.64121421 |

|                                          |            |            |
|------------------------------------------|------------|------------|
| LCK (Phospho-Tyr393)                     | 1.88731204 | 1.85101485 |
| PDGFR beta (Phospho-Tyr751)              | 1.84659234 | 1.54870689 |
| NFkB-p105/p50 (Phospho-Ser337)           | 1.79599404 | 2.07168904 |
| PPAR-gamma (Phospho-Ser112)              | 1.7929958  | 2.16171167 |
| Synuclein alpha (Phospho-Tyr125)         | 1.78866058 | 1.55638597 |
| IR (Phospho-Tyr1361)                     | 1.78386459 | 1.48031653 |
| STAT5A (Phospho-Ser780)                  | 1.76989368 | 1.10563231 |
| 14-3-3 theta/tau (Phospho-Ser232)        | 1.7008973  | 1.69523956 |
| p53 (Phospho-Ser6)                       | 1.67979144 | 1.65533886 |
| 4E-BP1 (Phospho-Thr36)                   | 1.6274711  | 1.27145006 |
| HSP27 (Phospho-Ser82)                    | 1.62004044 | 1.50622336 |
| NFkB-p65 (Phospho-Ser529)                | 1.61637705 | 1.70177006 |
| VASP (Phospho-Ser157)                    | 1.61195941 | 1.73878373 |
| Tau (Phospho-Ser396)                     | 1.60548821 | 1.09918416 |
| p44/42 MAPK (Phospho-Tyr204)             | 1.59901573 | 1.070279   |
| IGF1R (Phospho-Tyr1165/1166)             | 1.59104721 | 1.44576845 |
| Gab1 (Phospho-Tyr627)                    | 1.58918178 | 1.84014816 |
| VAV1 (Phospho-Tyr174)                    | 1.58671754 | 0.77458437 |
| GSK3 beta (Phospho-Ser9)                 | 1.57531557 | 1.62847302 |
| P70S6K-beta (Phospho-Ser423)             | 1.56506454 | 1.42650605 |
| E2F1 (Phospho-Thr433)                    | 1.56034127 | 1.33098781 |
| BTk (Phospho-Tyr223)                     | 1.55613193 | 1.00922394 |
| STAT6 (Phospho-Tyr641)                   | 1.54838595 | 1.43354543 |
| Integrin beta-3 (Phospho-Tyr773)         | 1.54085619 | 1.43081457 |
| BCL-XL (Phospho-Thr47)                   | 1.53771072 | 1.31320501 |
| Tau (Phospho-Thr205)                     | 1.53268363 | 0.85844836 |
| Tau (Phospho-Thr212)                     | 1.53215599 | 3.24712749 |
| HER4/ErbB4 (Phospho-Tyr1284)             | 1.52065808 | 1.69724387 |
| mTOR (Phospho-Thr2446)                   | 1.52032579 | 1.4698677  |
| Estrogen Receptor-alpha (Phospho-Ser118) | 1.50590146 | 1.20915191 |
| DAPP1 (Phospho-Tyr139)                   | 1.50133929 | 1.56357363 |
| Lamin A (Phospho-Ser22)                  | 1.49914622 | 1.73000303 |
| Smad2/3 (Phospho-Thr8)                   | 1.49687989 | 1.65054288 |
| BCR (Phospho-Tyr360)                     | 1.46675016 | 1.51033759 |
| Ezrin (Phospho-Tyr353)                   | 1.45843251 | 2.47356486 |
| STAM2 (Phospho-Tyr192)                   | 1.44297722 | 1.56476404 |
| A-RAF (Phospho-Tyr301/302)               | 1.43130081 | 1.52488069 |
| PDK1 (Phospho-Ser241)                    | 1.41883428 | 1.58353023 |
| Vinculin (Phospho-Tyr821)                | 1.39679387 | 1.81339106 |
| Catenin delta-1 (Phospho-Tyr228)         | 1.3959914  | 1.58560181 |
| Tau (Phospho-Thr181)                     | 1.38963801 | 1.68892844 |
| PLD1 (Phospho-Ser561)                    | 1.38916409 | 1.51103466 |
| c-Jun (Phospho-Tyr170)                   | 1.37760676 | 2.45252605 |
| HER2 (Phospho-Thr686)                    | 1.37560713 | 1.68209936 |
| MEK1 (Phospho-Ser221)                    | 1.33066999 | 1.88869289 |
| VASP (Phospho-Ser238)                    | 1.3000635  | 2.07349381 |
| IkB-alpha (Phospho-Ser32/36)             | 1.28742415 | 1.65769549 |
| HDAC4 (Phospho-Ser632)                   | 1.28300746 | 1.52700163 |
| M-CSF Receptor (Phospho-Tyr561)          | 1.28285249 | 1.61861654 |
| NMDAR1 (Phospho-Ser897)                  | 1.26685881 | 1.5113497  |
| Paxillin (Phospho-Tyr31)                 | 1.19412301 | 1.64788675 |
| DARPP-32 (Phospho-Thr34)                 | 1.18431612 | 0.47569792 |

|                                          |            |            |
|------------------------------------------|------------|------------|
| Ret (Phospho-Tyr905)                     | 1.18030293 | 1.64208642 |
| Caspase 9 (Phospho-Ser196)               | 1.16781639 | 1.54915257 |
| Pyk2 (Phospho-Tyr402)                    | 1.14672085 | 2.00770347 |
| Catenin beta (Phospho-Ser33)             | 1.13318021 | 1.5973677  |
| MEF2A (Phospho-Thr312)                   | 1.13006756 | 0.63855859 |
| HSP27 (Phospho-Ser78)                    | 1.11363636 | 1.55764463 |
| Smad3 (Phospho-Ser213)                   | 1.06740448 | 1.60195119 |
| Estrogen Receptor-alpha (Phospho-Ser104) | 1.05165122 | 0.6765868  |
| CrkII (Phospho-Tyr221)                   | 1.04814795 | 0.64896327 |
| Elk1 (Phospho-Thr417)                    | 1.01085653 | 1.50043422 |
| VEGFR2 (Phospho-Tyr951)                  | 0.9616111  | 2.07199518 |
| Caspase 9 (Phospho-Tyr153)               | 0.93238488 | 0.69321767 |
| eNOS (Phospho-Ser1177)                   | 0.90781166 | 0.65443808 |
| HDAC1 (Phospho-Ser421)                   | 0.90420502 | 0.43203522 |
| Smad3 (Phospho-Ser425)                   | 0.89278843 | 1.57594248 |
| AKT1S1 (Phospho-Thr246)                  | 0.87937691 | 0.59376814 |
| SP1 (Phospho-Thr739)                     | 0.87765257 | 1.85070949 |
| NFkB-p100/p52 (Phospho-Ser869)           | 0.85522206 | 1.51664396 |
| PKC delta (Phospho-Ser645)               | 0.84378043 | 0.63649156 |
| HER2 (Phospho-Tyr1221/Tyr1222)           | 0.83719472 | 0.65992535 |
| GSK3 alpha (Phospho-Ser21)               | 0.80033461 | 2.56288739 |
| Synaptotagmin (Phospho-Thr202)           | 0.79481595 | 0.61711692 |
| MKK4/SEK1 (Phospho-Thr261)               | 0.76834902 | 0.60062515 |
| IKK-gamma (Phospho-Ser31)                | 0.76325188 | 0.61388936 |
| MAP3K8/COT (Phospho-Thr290)              | 0.75770293 | 0.6939146  |
| EGFR (Phospho-Tyr1172)                   | 0.74237332 | 0.48313306 |
| Estrogen Receptor-alpha (Phospho-Ser106) | 0.73979133 | 0.6802518  |
| SHP-2 (Phospho-Tyr580)                   | 0.73568223 | 0.63298831 |
| NFkB-p105/p50 (Phospho-Ser927)           | 0.69390873 | 0.54647309 |
| LYN (Phospho-Tyr507)                     | 0.67747666 | 0.5419336  |
| ATP1A1/Na+K+ ATPase1 (Phospho-Ser23)     | 0.67328506 | 1.03358422 |
| STAT4 (Phospho-Tyr693)                   | 0.67151974 | 1.00142745 |
| FAK (Phospho-Tyr397)                     | 0.67114155 | 0.69886877 |
| Rel (Phospho-Ser503)                     | 0.67093154 | 0.95819247 |
| Ras-GRF1 (Phospho-Ser916)                | 0.66848779 | 0.76341485 |
| Shc (Phospho-Tyr349)                     | 0.64535247 | 0.82144882 |
| FAS (Phospho-Tyr291)                     | 0.61267418 | 0.80353981 |
| GluR2 (Phospho-Ser880)                   | 0.60318531 | 0.68940892 |
| Rb (Phospho-Ser780)                      | 0.58182929 | 0.49950186 |
| Abl1 (Phospho-Tyr204)                    | 0.52726965 | 0.51344122 |
| 4E-BP1 (Phospho-Ser65)                   | 0.51014307 | 0.5576899  |
| BRCA1 (Phospho-Ser1457)                  | 0.51001129 | 0.83262298 |
| SYK (Phospho-Tyr525)                     | 0.49291706 | 0.53658079 |
| Raf1 (Phospho-Ser296)                    | 0.45110474 | 0.69255234 |
| Cyclin D1 (Phospho-Thr286)               | 0.39552343 | 0.57634133 |
